# Supplementary material
Source: ML conference proceedings conference paper supplement (https://proceedings.mlr.press/v139/no21a.html)
Supplement: Supplementary file 3 [file no21a-supp.zip]

Archive with 2 entries (2 files):
- pmlr_form.pdf
- supp.pdf
